# Supplementary material
Source: publisher site journal article supplement (https://www.spandidos-publications.com/2205/downloadSupplementary)
Supplement: Supplementary file 1 [file downloadSupplementary]

## Sheet: CNV Loci
Table SII. Loci associated with significant copy number variation shown in Fig. 3.
Chromosome	Region	Loci
1	1q23; 1q32	C1orf34, LOC645058, C1orf141, LY9, ATP6V1G3, IRF6, C1orf107, LOC653164
2	2q24; 2q34	LOC402102, AHCTF1P, G6PC2, LOC646233, ERBB4
3	(3p11); (3q12-3q13)	(LOC391509, LOC442077, LOC645047, CGGBP1) ; (PCNP, LOC391560, PVRL3, LOC646200)
4	(4p16-4p15); (4q31)	(LOC644414, OR7E86P, OR7E84P, LOC644445, OR7E85P, LOC285479, OR7E83P, LOC644483, DHX15, ATPSLP3, SOD3); (LOC644484, PLRG1, FGB, FGA, FGG, SORBS2, FLJ25801, FLJ36180)
5	(5p15); (5q23); (5q34-5q35)	(LOC645817, FBXL7, UGT3A2, MGC33648, DKFZP781F1119); (SLC27A6, ISOC1); (RARS, LOC345630, PANK3, LOC389342, DOCK2)
6	6p12	LOC653816
7	(7p21); (7q11); (7q21-23)	(LOC317727, ITGB8); (LOPC285908, TCEB1P, LOC644710, LOC3463290; (LOC402562, LOC644972, LOC442714, G10, PTCD1)
8	8q21; 8q22	LOC441344, CA2, ANKRD46
9	9q21.2; 9q22.3	GNAQ, ROR2
10	10q23; 10q25	LOC399715, DKFZP667F0711, LOC644117, IFIT1, SLC18A2
11	(11p15-11p14); (11q12-11q14); 11q21	(FAM10A5, SAA1, MPPED2); (LOC643376, FLJ36874, LOC642791, MTNR1B); (SLC36A4, LOC440069)
12	(12p13); (12q21)	(CCND2, C12orf5, FGF23, CLEC1A, LOC390294, CLEC7A, MGP); (FLJ32115, GGTA1P, LOC653079, ZDHHC17, CSRP2, E2F7)
13	13q21.3	PCDH9
14	14q12	BNIP3P
15	15q26	ARRDC4
16	16p12	XYLT1
17	17p13	MYO1C, KIAA0523
18	18q12	ZNF271
19	19q13	EIF354, RGS98P, NUDT19, ZNF350
20	20q13	LOC643503, ARFGEF2, SNAP23P, CSE1L
21	21q11; 21q22	POLR2CP, C21orf34, CHODL, PRSS7, DSCR6
22	22q13	PACSIN2
